# Supplementary material for: Hydroxyapatite nanoparticle-modified porous bone grafts with improved cell attachment
Source: Royal Society of Chemistry journal article supplement (doi:10.1039/d3tb01839c), 2023-01-01
Supplement: d3tb01839c1.pdf [file d3tb01839c1.pdf]

## SUPPLEMENTAL INFORMATION

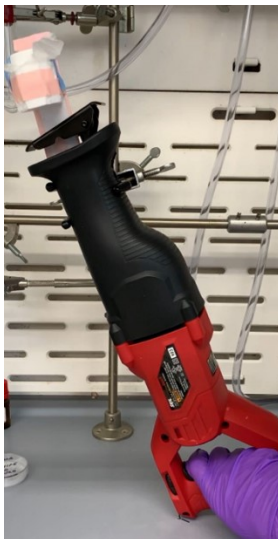

**SI Figure 1.** Image of custom emulsion mixer used to mix the aqueous phase into the organic phase of the emulsion.

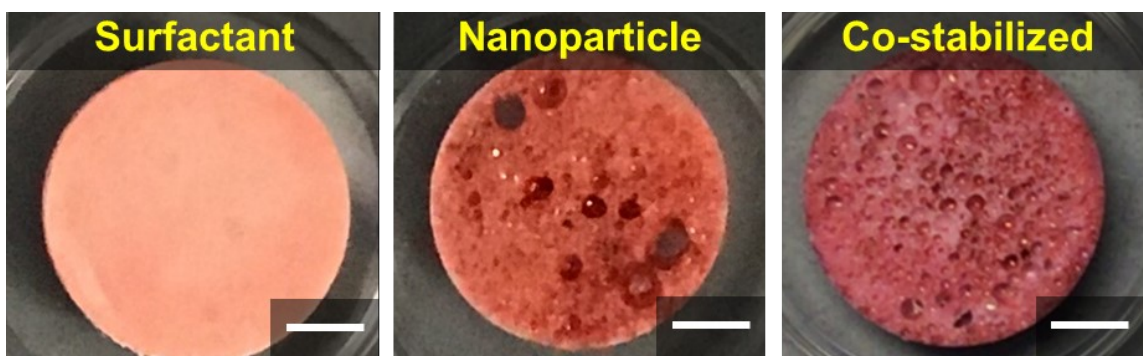

**SI Figure 2:** The presence of calcium is verified with Alizarin Red S. staining of nHA at the surface of the nHA-stabilized and co-stabilized porous scaffolds as compared to the negative control of the surfactant-stabilized porous scaffold. Scale bar = 2 mm.

**SI Table 1:** Gel fraction, compressive modulus, and compressive strength for surfactant-stabilized, nanoparticle-stabilized, and co-stabilized polyMIPEs.

|                            | PGPR (n)       | nHA (n)         | Co-stabilized (n) |
|----------------------------|----------------|-----------------|-------------------|
| Gel Fraction (%)           | 96.6 ± 1.1 (8) | 94.3 ± 1.7 (7)  | 97.5 ± 1.6 (9)    |
| Compressive Modulus (MPa)  | 29.2 ± 6.4 (6) | 44.9 ± 11.0 (5) | 41.6 ± 6.4 (5)    |
| Compressive Strength (MPa) | 2.5 ± 0.4 (6)  | 3.9 ± 1.0 (5)   | 3.6 ± 0.5 (5)     |

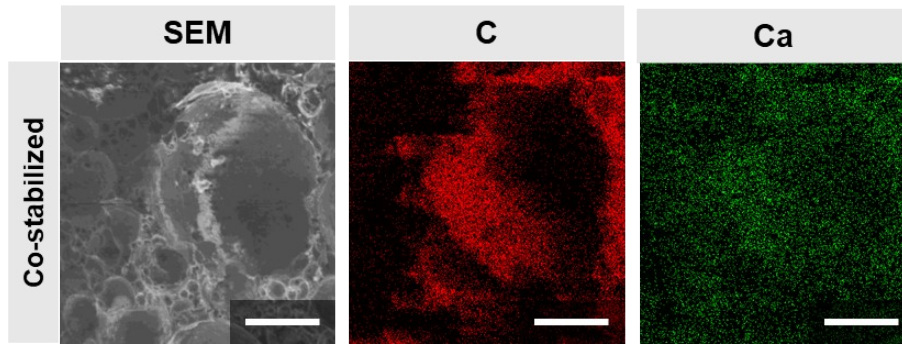

**SI Figure 3:** Carbon and calcium mapping with EDS to demonstrate the presence of nanoparticles at the pore surface of co-stabilized polyMIPEs. Scale bars = 100  $\mu$ m.

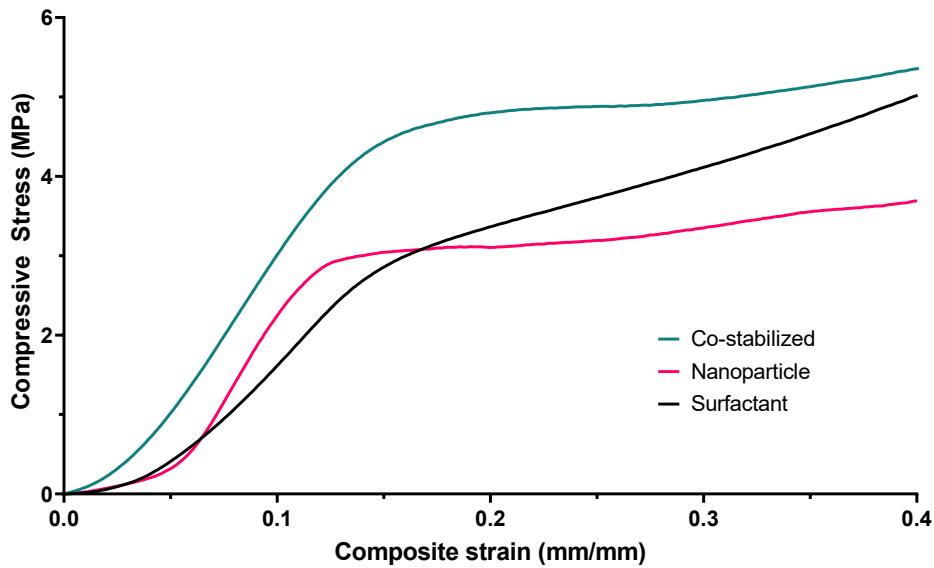

**SI Figure 4:** Representative stress-strain curves of surfactant, nanoparticle, and co-stabilized polyMIPEs.
